# Supplementary material for: A Simplified Treatment for Efficiently Modeling the Spectral Signal of Vibronic Transitions: Application to Aqueous Indole
Source: MDPI journal article supplement (doi:10.3390/molecules27238135), 2022-11-22
Supplement: s1 [file s1]

**Supplementary Materials:**  
**A simplified treatment for efficiently modeling the spectral  
signal of vibronic transitions: application to aqueous  
Indole**

Cheng Giuseppe Chen<sup>1</sup>, Massimiliano Aschi<sup>2</sup>, Marco D'Abramo<sup>1,\*</sup>, and Andrea Amadei<sup>3,\*</sup>

# S1 Benchmark of DFT functionals for the calculation of the gas phase vibronic transitions

The following functionals were considered to calculate the gas phase vibronic transitions of indole: B3LYP<sup>1</sup>, CAM-B3LYP<sup>2</sup>, PBE0<sup>3</sup>, M06-2X<sup>4</sup> and  $\omega$ B97X-D<sup>5</sup>. For each of those functionals we calculated the optimized geometries (both for the ground and the excited states) and their corresponding frequencies using TD-DFT and 6-311+G(d) as the basis set. All the calculations were performed using Gaussian16<sup>6</sup>. We show the results obtained for the geometry corresponding to the ground state minimum in Table S1.

**Table S1:** Gas phase excitation energies ( $\Delta E$ ) and electric transition dipole square length ( $|\mu|^2$ ) for the ground state  $\rightarrow L_b$  and ground state  $\rightarrow L_a$  transitions of indole calculated using different functionals. We highlighted in bold the functionals in which the order of the  $L_b$  and  $L_a$  states is inverted compared to the results obtained with EOM-CCSD/6-311+G(d) (i.e.  $\Delta E(L_b) < \Delta E(L_a)$ , see main text).

|                 | $L_b$           |                  | $L_a$           |                  |
|-----------------|-----------------|------------------|-----------------|------------------|
|                 | $\Delta E$ (eV) | $ \mu ^2$ (a.u.) | $\Delta E$ (eV) | $ \mu ^2$ (a.u.) |
| <b>B3LYP</b>    | <b>4.8483</b>   | 0.2800           | <b>4.7081</b>   | 0.6588           |
| CAM-B3LYP       | 4.9920          | 0.3141           | 5.0388          | 0.8928           |
| <b>PBE0</b>     | <b>4.9476</b>   | 0.3154           | <b>4.8229</b>   | 0.6784           |
| M06-2X          | 5.0527          | 0.3951           | 5.1028          | 0.8294           |
| $\omega$ B97X-D | 5.0089          | 0.2906           | 5.0637          | 0.9129           |

From these results we immediately discarded B3LYP and PBE0 because of the inaccurate description of the  $L_b$  and  $L_a$  electronic states, in particular inverting the order of those states.

With the remaining functionals (i.e. CAM-B3LYP, M06-2X and  $\omega$ B97X-D) we calculated the gas phase vibronic spectrum corresponding to the ground state  $\rightarrow L_b$  transition (see Figure S1) using the method implemented in Gaussian16<sup>7,8</sup> and no significant difference was observed. A larger basis set was also tested with M06-2X, namely aug-cc-pVTZ<sup>9</sup> (see Figure S1), which provided similar results.

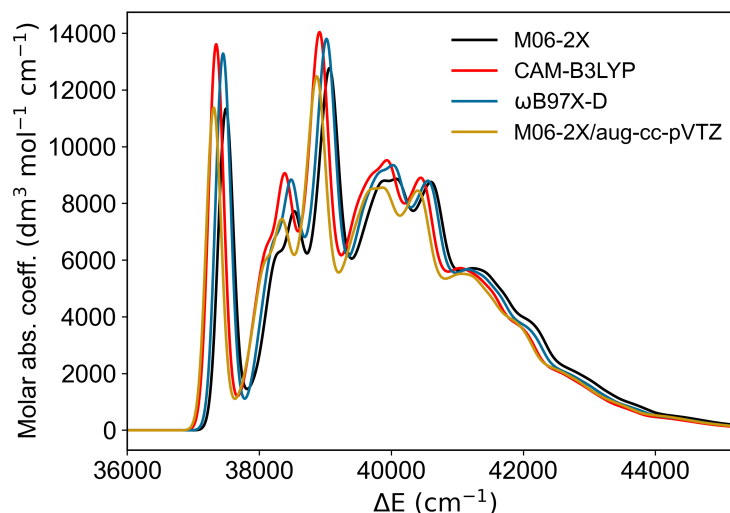

**Figure S1:** Gas phase vibronic spectra corresponding to the ground state  $\rightarrow L_b$  transition calculated using the method implemented in Gaussian16 (see main text) and M06-2X (black and yellow), CAM-B3LYP (red) and  $\omega$ B97X-D (blue) as functionals and 6-311+G(d) as the basis set, except when mentioned (in which case aug-cc-pVTZ was used).

## References

- [1] P. J. Stephens, F. J. Devlin, C. F. Chabalowski and M. J. Frisch, *J. Chem. Phys.*, 1994, **98**, 11623–11627.
- [2] T. Yanai, D. P. Tew and N. C. Handy, *Chem. Phys. Lett.*, 2004, **393**, 51–57.
- [3] C. Adamo and V. Barone, *J. Chem. Phys.*, 1999, **110**, 6158–6170.
- [4] Y. Zhao and D. G. Truhlar, *Theor. Chem. Acc.*, 2008, **120**, 215–241.
- [5] J.-D. Chai and M. Head-Gordon, *Phys. Chem. Chem. Phys.*, 2008, **10**, 6615–6620.
- [6] M. J. Frisch, G. W. Trucks, H. B. Schlegel, G. E. Scuseria, M. A. Robb, J. R. Cheeseman, G. Scalmani, V. Barone, G. A. Petersson, H. Nakatsuji, X. Li, M. Caricato, A. V. Marenich, J. Bloino, B. G. Janesko, R. Gomperts, B. Mennucci, H. P. Hratchian, J. V. Ortiz, A. F. Izmaylov, J. L. Sonnenberg, D. Williams-Young, F. Ding, F. Lipparini, F. Egidi, J. Goings, B. Peng, A. Petrone, T. Henderson, D. Ranasinghe, V. G. Zakrzewski, J. Gao, N. Rega, G. Zheng, W. Liang, M. Hada, M. Ehara, K. Toyota, R. Fukuda, J. Hasegawa, M. Ishida, T. Nakajima, Y. Honda, O. Kitao, H. Nakai, T. Vreven, K. Throssell, J. A. Montgomery, Jr., J. E. Peralta, F. Ogliaro, M. J. Bearpark, J. J. Heyd, E. N. Brothers, K. N. Kudin, V. N. Staroverov, T. A. Keith, R. Kobayashi, J. Normand, K. Raghavachari, A. P. Rendell, J. C. Burant, S. S. Iyengar, J. Tomasi, M. Cossi, J. M. Millam, M. Klene, C. Adamo, R. Cammi, J. W. Ochterski, R. L. Martin, K. Morokuma, O. Farkas, J. B. Foresman and D. J. Fox, *Gaussian-16 Revision B.01*, 2016, Gaussian Inc. Wallingford CT.
- [7] F. Santoro, A. Lami, R. Improta, J. Bloino and V. Barone, *J. Chem. Phys.*, 2008, **128**, 224311.
- [8] V. Barone, J. Bloino, M. Biczysko and F. Santoro, *J. Chem. Theory Comput.*, 2009, **5**, 540–554.
- [9] R. A. Kendall, T. H. Dunning and R. J. Harrison, *J. Chem. Phys.*, 1992, **96**, 6796–6806.
